## Analysis of internet trends related to medications for COVID-19 in ten countries with the highest number of cases

Josimar E. Chire Saire<sup>1</sup> Roselyn Lemus-Martin<sup>2</sup>

<sup>1</sup>Institute of Mathematics and Computer Science (ICMC),  
University of São Paulo (USP)  
São Carlos, SP, Brazil

<sup>2</sup>Genomics Medicine Institute,  
Mexico city, Mexico  
jecs89@usp.br, roselyn.lemus@gmail.com

### Abstract

During the last months, the pandemic generated by coronavirus SARS-CoV-2 moved governments, research groups and health organizations to plan, test and execute health policies. At the beginning, the treatment was not clear but in the next months, research groups have conducted studies to recommend or ban some medicines. At the same time, countries with most cases were changing from Asia, Europe to America. Different treatments and medications have been tested and recommended in many countries, such as Hydroxycloquine, Ivermectin, Azithromycin, Dexamethasone, Prednisone, Desivir. This paper is a preliminary study about what people are searching on Internet, considering ten countries with most cases in the world such as Chile, Spain, United Kingdom, Brazil, United States, India, Russia, South Africa, Peru, Mexico. **Keywords:** Data Mining, Google Trends, Covid-19

### Introduction

Since first reported in Wuhan, China, in late December 2019, the outbreak of the novel coronavirus now known as SARS-CoV-2 has spread globally. As of the second week of August 2020, the novel coronavirus disease (COVID-19) pandemic has now reached over 21 million confirmed cases worldwide and approximately 762,000 deaths worldwide according to the Johns Hopkins University Coronavirus Resource Center. COVID-19 case numbers are alarming in both their volume and widening geographic scope but there are also concerns about the accuracy of reported COVID-19 case numbers, particularly at earlier stages of the pandemic and in the last months within the Latin American region, and whether underreporting may have blurred the true extent of the outbreak from the beginning and its health and economical impact. There are many studies using Google Trends to analyze, forecast topics related to dengue (Anggraeni and Aristiani 2016), elections (Polykalas, Prezerakos, and Konidaris 2013), programming (Chen and Xing 2016) and recently, studying covid-19 topic in Ghana (Chire and Panford-Quainoo 2020), France (Chire and Oblitas Cruz

Copyright © 2021, Association for the Advancement of Artificial Intelligence (www.aaai.org). All rights reserved.

2020) and South America Region (Chire and Mahmood 2020).

The contribution of this paper:

- Study the interest of citizens through Google Search tool around medication for Covid-19
- Analyze the differences between trends in countries with high incidence of cases

### Proposal

The presented paper follows a methodology inspired on Cross Industry Standard Process for Data Mining (CRISP-DM) (Shearer 2000). The steps for the conducted study are detailed in the next subsections.

### Selecting the scope of the analysis

The first question to answer came from the announcements of new vacuum for coronavirus, therefore the question is: what treatment or medication is most popular in population? By consequence, to set the scope of the study, countries with more cases were selected. The analysis considers the ten countries (see Fig. 1) with more infections.

Figure 1: Ten countries with the highest total cases <sup>1</sup>



| virusncov.com<br>COVID-19 Coronavirus - Update<br>Last updated: 2020-07-29 20:00:05 UTC+7 |                                                                                                  |           |    |                                                                                              |         |
|-------------------------------------------------------------------------------------------|--------------------------------------------------------------------------------------------------|-----------|----|----------------------------------------------------------------------------------------------|---------|
| 1                                                                                         |  USA          | 4,200,751 | 6  |  Peru   | 371,096 |
| 2                                                                                         |  Brazil       | 2,303,661 | 7  |  Mexico | 370,712 |
| 3                                                                                         |  India        | 1,333,553 | 8  |  Chile  | 338,759 |
| 4                                                                                         |  Russia       | 800,849   | 9  |  Spain  | 317,246 |
| 5                                                                                         |  South Africa | 408,052   | 10 |  UK     | 297,914 |

### Find the relevant terms to search

The proposed terms are related to medication used in many countries, the terms are: Chlorine Dioxide, Ivermectin, Azithromycin, Dexamethasone, Prednisone, Desivir. These terms were selected a review of news from different countries about treatment against covid19.

<sup>1</sup>Data from <https://virusncov.com/>

## Build the Query and collect data

Trends using Google search can be useful to analyze how was the interest of one country/city around one term. Period of study: 01-07-2020 to 22-07-2020 and the terms were mentioned previously.

## Visualization

After the collection of data from Google Trends, this step helps to present data and support analysis about covid19 and medication in Top 10 countries. Series plot to show the evolution from 01 to 22 July for the selected terms.

## Results and Discussion

### Population of countries

The analysis is considering the next countries: Usa, Brazil, India, Russia, South Africa, Peru, Mexico, Chile, Spain, Uk. Therefore, they are representing North America, South America, Asia, Europe. Table 1 is presenting the population of every country, number of covid19 total cases and proportion of total infections.

Table 1: Statistics from countries

|              | Population    | Total cases | Percentage |
|--------------|---------------|-------------|------------|
| Usa          | 331,219,971   | 4,049,153   | 1.2225     |
| Brazil       | 212,728,883   | 2,178,159   | 1.0239     |
| India        | 1,381,531,706 | 1,236,696   | 0.0895     |
| Russia       | 145,941,418   | 789,190     | 0.5408     |
| South Africa | 59,393,181    | 381,798     | 0.6428     |
| Peru         | 33,023,841    | 362,087     | 1.0964     |
| Mexico       | 129,085,387   | 356,255     | 0.2760     |
| Chile        | 33,023,841    | 334,683     | 1.0135     |
| Spain        | 46,756,791    | 314,631     | 0.6729     |
| Uk           | 67,925,910    | 296,377     | 0.4363     |

It is important to consider that each country has different numbers of population then to observe the total number of cases is appropriate to analyze the proportion of total infections over the total population. If the analysis only considers data related to total cases of Table 1, then Usa, Brazil and India are the three nations with more infections. But, considering column Percentage of Table 1, Usa, Peru and Brazil are on the top. At the same time Usa is not the most populated country neither Brazil or Peru.

### Google Trends Results

Performing the query using the terms mentioned previously in the section of the proposal, results are in Figure 2.

Rusian, India presents a constant interest for Azythromycin. Chlorine dioxide in Peru, Mexico and Spain. Brazil, Mexico have a decay of interest about Ivermectine and Peru an increasing number during the last week. Prednisone in United States has a constant interest. Remdesivir has global decay from 01 July and a constant value for India. Dexamethasone for Russia, Brazil, Mexico, Peru has a constant interest.

In conclusion, it is possible identify the interest of users using Google Trends which considers the searches made in one country to present the data. Besides, citizens from the countries with more infections are constantly searching information about medication showing the worrying about the

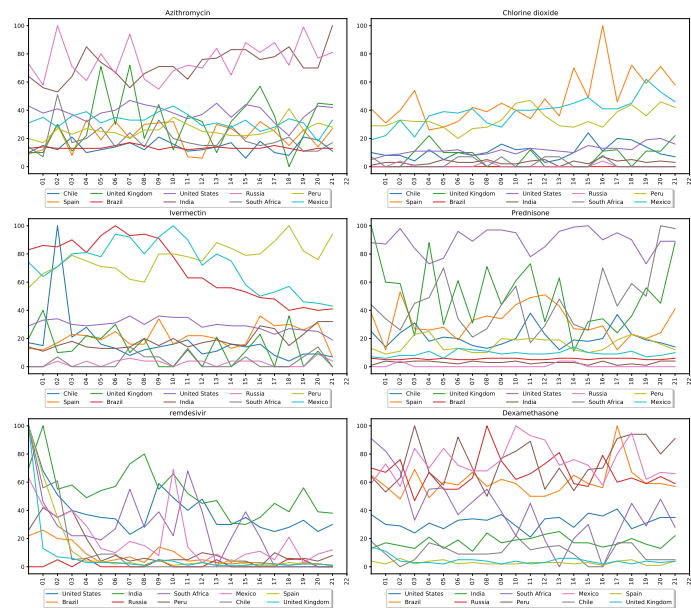

Figure 2: Terms: Azithromycin, Chlorine Dioxide, Ivermectin, Prednisone, Dexamethasone, Remdesivir

panademic covid-19 and opens an issue about self-medication to get a fast aliviation and response.

## References

- Anggraeni, W.; and Aristiani, L. 2016. Using Google Trend data in forecasting number of dengue fever cases with ARIMA method case study: Surabaya, Indonesia. In *2016 International Conference on Information Communication Technology and Systems (ICTS)*, 114–118.
- Chen, C.; and Xing, Z. 2016. Towards Correlating Search on Google and Asking on Stack Overflow. In *2016 IEEE 40th Annual Computer Software and Applications Conference (COMPSAC)*, volume 1, 83–92.
- Chire, J.; and Mahmood, K. 2020. Hope Amid of a Pandemic: Is Psychological Distress Alleviating in South America while Coronavirus is still on Surge?
- Chire, J.; and Panford-Quainoo, K. 2020. Twitter Interaction to Analyze Covid-19 Impact in Ghana, Africa from March to July.
- Chire, J. E.; and Oblitas Cruz, J. F. 2020. Study of Coronavirus Impact on Parisian Population from April to June using Twitter and Text Mining Approach. *medRxiv* doi: 10.1101/2020.08.15.20175810. URL <https://www.medrxiv.org/content/early/2020/08/18/2020.08.15.20175810>.
- Polykalas, S. E.; Prezerakos, G. N.; and Konidaris, A. 2013. An algorithm based on Google Trends' data for future prediction. Case study: German elections. In *IEEE International Symposium on Signal Processing and Information Technology*, 000069–000073.
- Shearer, C. 2000. The CRISP-DM Model: The New Blueprint for Data Mining. *Journal of Data Warehousing* 5(4).
